# Supplementary material for: Well-distributed Pt-nanoparticles within confined coordination interspaces of self-sensitized porphyrin metal–organic frameworks: synergistic effect boosting highly efficient photocatalytic hydrogen evolution reaction
Source: Royal Society of Chemistry journal article supplement (doi:10.1039/c9sc01866b), 2019-01-01
Supplement: c9sc01866b1.pdf [file c9sc01866b1.pdf]

**Well-Distributed Pt-Nanoparticles within Confined Coordination Interspaces of  
Self-Sensitized Porphyrin Metal-Organic Frameworks: Synergistic Effect  
Boosting Highly Efficient Photocatalytic Hydrogen Evolution Reaction**

**Shuai Li, Hong-Min Mei, Shi-Lin Yao, Zhi-Yao Chen, Yu-Lin Lu, Li Zhang\*, Cheng-  
Yong Su\***

MOE Laboratory of Bioinorganic and Synthetic Chemistry, Lehn Institute of Functional Materials,  
School of Chemistry, Sun Yat-Sen University, Guangzhou 510275, China

E-mail: zhli99@mail.sysu.edu.cn; cesscy@mail.sysu.edu.cn

**Contents**

- 1. Comparison of H<sub>2</sub> Evolution Rates of Different MOF Composites**
- 2. General Information**
- 3. Physical Characterizations**
- 4. Chemical Stability Study**
- 5. Photocatalytic Reactions**
- 6. Mechanism Study**

## Captions for Figures and Tables

**Figure S1.** The crystal structure of PdTMCPP.

**Figure S2.** XPS spectrum of Pt@Pd-PCN-222(Hf).

**Figure S3.** Water sorption isotherms of Pd-PCN-222(Hf) and Pt@Pd-PCN-222(Hf).

**Figure S4.** Particle size distribution of Pt NPs along the length.

**Figure S5.** The electron tomographic reconstruction of Pt@Pd-PCN-222(Hf).

**Figure S6.** PXRD patterns of Pd-PCN-222(Hf) upon treatment in different solvents.

**Figure S7.** PXRD patterns of Pt@Pd-PCN-222(Hf) upon treatment in different solvents.

**Figure S8.** PXRD patterns of Pd-PCN-222(Hf) in aqueous solutions with a pH range of 1-12.

**Figure S9.** PXRD patterns of Pt@Pd-PCN-222(Hf) in aqueous solutions with a pH range of 1-12.

**Figure S10.** Steady-state UV-vis spectra of Pd-PCN-222(Hf) and Pt@Pd-PCN-222(Hf).

**Figure S11.** Mott-Schottky plots of PdTMCPP in 0.2 M Na<sub>2</sub>SO<sub>4</sub> aqueous solution.

**Figure S12.** Mott-Schottky plots of Pd-PCN-222(Hf) in 0.2 M Na<sub>2</sub>SO<sub>4</sub> aqueous solution.

**Figure S13.** Mott-Schottky plots of Pt@Pd-PCN-222(Hf) in 0.2 M Na<sub>2</sub>SO<sub>4</sub> aqueous solution.

**Figure S14.** Tauc plot of PdTMCPP.

**Figure S15.** Tauc plot of Pd-PCN-222(Hf).

**Figure S16.** Tauc plot of Pt@Pd-PCN-222(Hf).

**Figure S17.** The TEM image of Pt@Pd-PCN-222(Hf) after the first run (3 h).

**Figure S18.** PXRD patterns of Pt@Pd-PCN-222(Hf) after photocatalytic reaction of 32 h.

**Figure S19.** XPS spectrum of Pt@Pd-PCN-222(Hf) after photocatalytic reaction of 32 h.

**Figure S20.** Photoluminescence emission spectra of Pd-PCN-222(Hf) and Pt@Pd-PCN-222(Hf).

**Figure S21.** Emission decay of PCN-222(Hf) (a), Pd-PCN-222(Hf) (b) and Pt@Pd-PCN-222(Hf) (c) at 298 K under vacuum.

**Table S1.** Comparison of H<sub>2</sub> evolution rates of different MOF composites under visible light irradiation.

**Table S2.** Optimization of reaction conditions.

**Table S3.** The amount of H<sub>2</sub> produced in different reaction time.

**Table S4.** H<sub>2</sub> evolution rates of porphyrin-based MOFs.

**Table S5.** The TA lifetime of Pd-PCN-222(Hf) and Pt@Pd-PCN-222(Hf).

**Table S6.** The PL lifetime of Pd-PCN-222(Hf) and Pt@Pd-PCN-222(Hf) (in the vacuum).

## 1. Comparison of H<sub>2</sub> Evolution Rates of Different MOF Composites

**Table S1.** Comparison of H<sub>2</sub> evolution rates of different MOF composites under visible light irradiation.

| Catalyst                     | Co-catalyst | Photosensitizer | Light source<br>(nm) | H <sub>2</sub> production rate<br>( $\mu\text{mol}\cdot\text{g}^{-1}\cdot\text{h}^{-1}$ ) | TON and TOF<br>(based on Pt NPs)            | Reference                                                        |
|------------------------------|-------------|-----------------|----------------------|-------------------------------------------------------------------------------------------|---------------------------------------------|------------------------------------------------------------------|
| MIL-100(Fe)                  | Pt NPs      | None            | $\geq 420$           | 98                                                                                        | TON = 23.97<br>TOF = 2.66 h <sup>-1</sup>   | <i>New J. Chem.</i> <b>2016</b> , <i>40</i> , 9170-9175          |
| UiO-66-NH <sub>2</sub> (Zr)  | Pt NPs      | None            | > 380                | 257                                                                                       | TON = 17.48<br>TOF = 1.75 h <sup>-1</sup>   | <i>Angew. Chem. Int. Ed.</i> <b>2016</b> , <i>55</i> , 9389-9393 |
| MIL-125-NH <sub>2</sub> (Ti) | Pt NPs      | None            | > 420                | 367                                                                                       |                                             | <i>J. Phys. Chem. C</i> <b>2012</b> , <i>116</i> , 20848-20853   |
| Al-TCPP                      | Pt NPs      | None            | > 380                | 129                                                                                       | TON = 573.2<br>TOF = 35.8 h <sup>-1</sup>   | <i>Adv. Mater.</i> <b>2018</b> , <i>30</i> , 1705112             |
| Al-PMOF                      | Pt NPs      | None            | $\geq 420$           | 200                                                                                       | TON = 22<br>TOF = 4 h <sup>-1</sup>         | <i>Angew. Chem. Int. Ed.</i> <b>2012</b> , <i>51</i> , 7440-7444 |
| USTC-8 (In)                  | Pt NPs      | None            | > 380                | 341                                                                                       | TON = 66.54<br>TOF = 4.5 h <sup>-1</sup>    | <i>ACS Catal.</i> <b>2018</b> , <i>8</i> , 4583-4590             |
| UiO-66(Zr)                   | Pt NPs      | Rhodamine B     | $\geq 420$           | 116                                                                                       | TON = 33.99<br>TOF = 2.26 h <sup>-1</sup>   | <i>Chem. Commun.</i> <b>2014</b> , <i>50</i> , 7063-7066         |
| MIL-101-NH <sub>2</sub> (Cr) | Pt NPs      | Rhodamine B     | $\geq 420$           | 477                                                                                       | TON = 247<br>TOF = 8.23 h <sup>-1</sup>     | <i>Chem. Commun.</i> <b>2014</b> , <i>50</i> , 11645-11648       |
| Pt@MIL-125/Au                | Pt NPs      | None            | > 380                | 1743                                                                                      | TON = 416.31<br>TOF = 69.38 h <sup>-1</sup> | <i>Angew. Chem. Int. Ed.</i> <b>2018</b> , <i>57</i> , 1103-1107 |
| MIL-101/CdS                  | Pt NPs      | None            | > 420                | 7550                                                                                      | TON = 4582.7<br>TOF = 294.5 h <sup>-1</sup> | <i>Chem. Commun.</i> <b>2013</b> , <i>49</i> , 6761-6763         |
| Pt@Pd-PCN-222(Hf)            | Pt NPs      | None            | $\geq 420$           | 22674                                                                                     | TON = 4131.2<br>TOF = 482.5 h <sup>-1</sup> | This work                                                        |

## 2. General Information

All reagents and solvents used in this work were purchased from commercial supplies without further purification. Powder X-ray diffraction (PXRD) studies were carried out on a Rigaku Smart Lab diffractometer (Bragg-Brentano geometry, Cu-K $\alpha$ 1 radiation,  $\lambda = 1.54056 \text{ \AA}$ ). UV-vis spectra were tested on a Shimadzu/UV-3600 spectrophotometer. Inductively coupled plasma optical emission spectrometer (ICP-OES) were measured on Thermo ICAP Qc. Gas and vapor adsorption measurements were carried out using a Quantachrome Autosorb-iQ2 and Autosorb-iQ-MP-VP analyzer, respectively. Prior to an adsorption measurement, samples were typically heated at 150°C under vacuum for 18 h to remove the adsorbed solvent molecules. Scanning electron microscopy (SEM) analysis was performed using a Quanta 400F. Samples for SEM tests were dispersed in EtOH with the aid of sonication, and then deposited on a conductive tape. Transmission electron microscopy (TEM) investigations, energy dispersive X-ray (EDX) elemental mapping and high-angle annular dark-field scanning TEM (HAADF-STEM) were performed by JEM-ARM200P. Prior to TEM measurements, samples were dispersed in EtOH using a sonication method, and then mounted on a carbon coated copper grid. Tomographic experiments were performed on Leica EM UC6/FC6, and the epoxy resin act as embedding medium. X-ray photoelectron spectroscopy (XPS) measurement was performed on a ULVAC PHI Quantera microprobe. Electrochemical measurement was performed on a CHI 660e electrochemical workstation.

### 3. Physical Characterizations

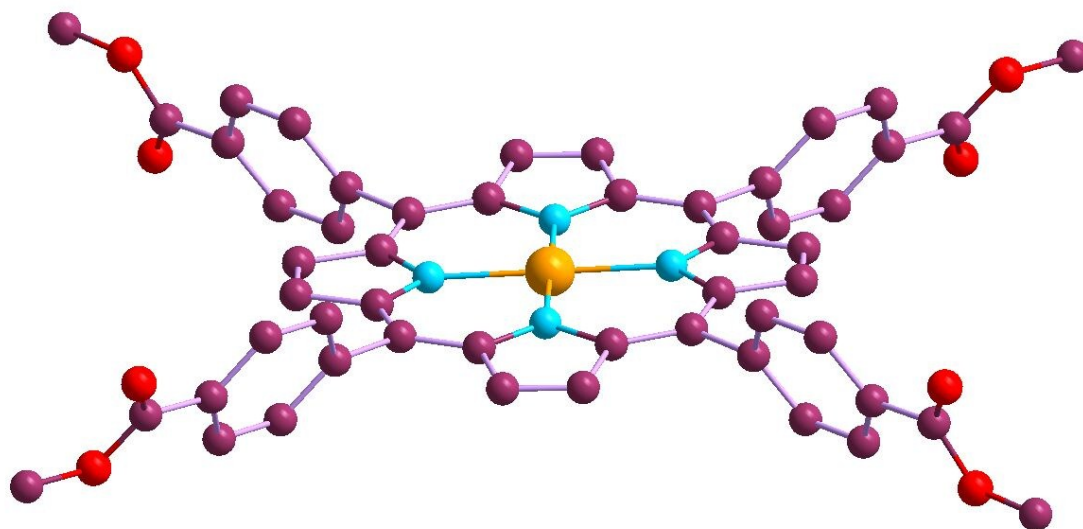

**Figure S1.** The crystal structure of PdTMCPP.

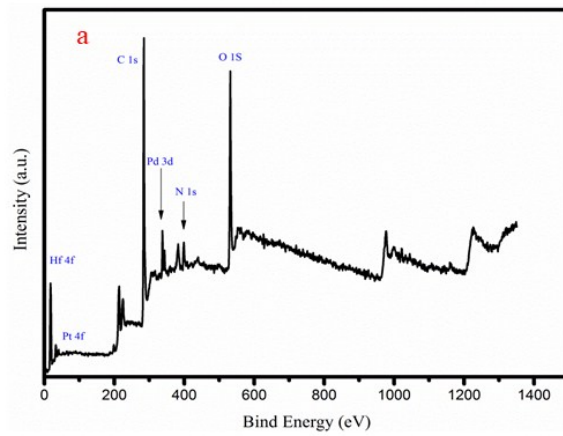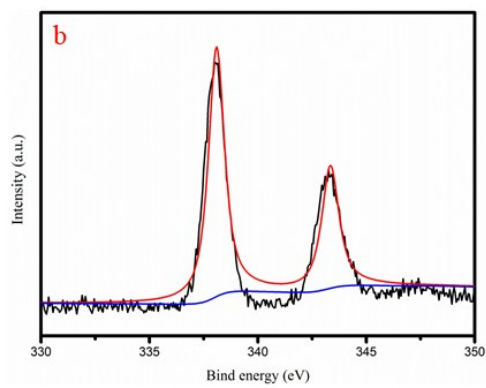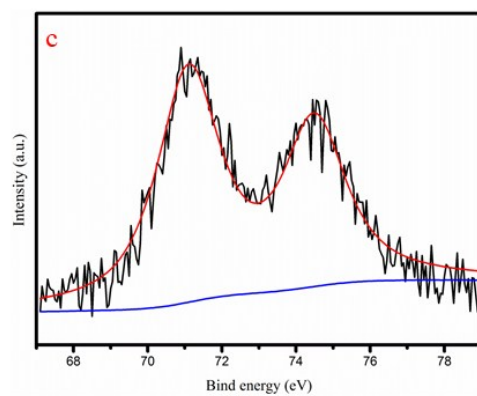

**Figure S2.** XPS spectrum of Pt@Pd-PCN-222(Hf).

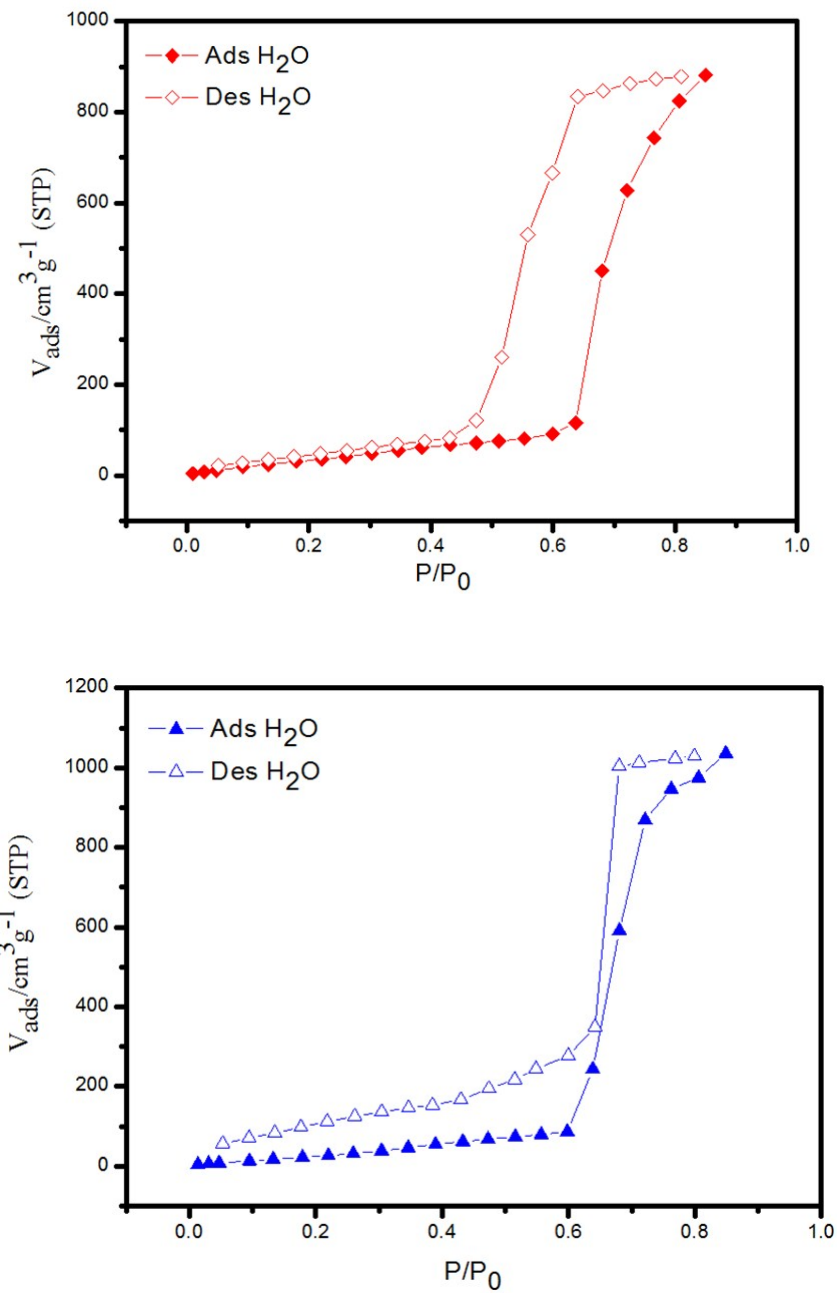

**Figure S3.** Water sorption isotherms of Pd-PCN-222(Hf) (up) and Pt@Pd-PCN-222(Hf) (down).

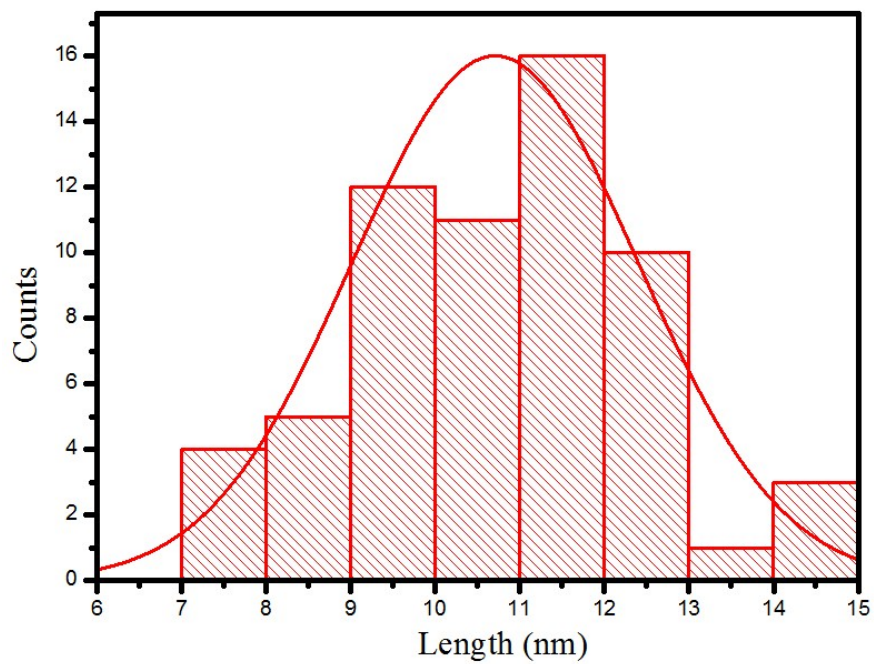

**Figure S4.** Particle size distribution of Pt NPs along the length.

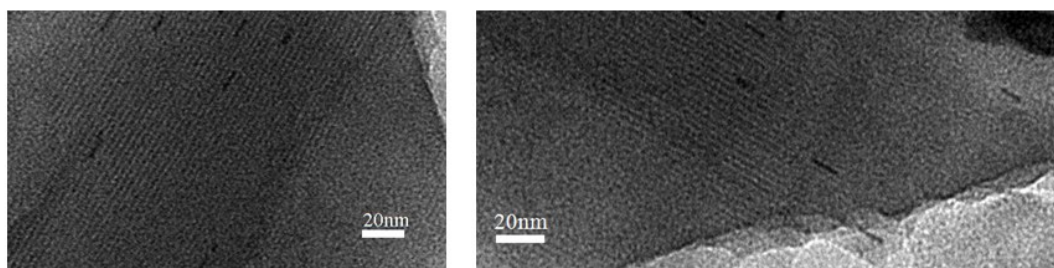

**Figure S5.** The electron tomographic reconstruction of Pt@Pd-PCN-222(Hf).



#### 4. Chemical Stability Study

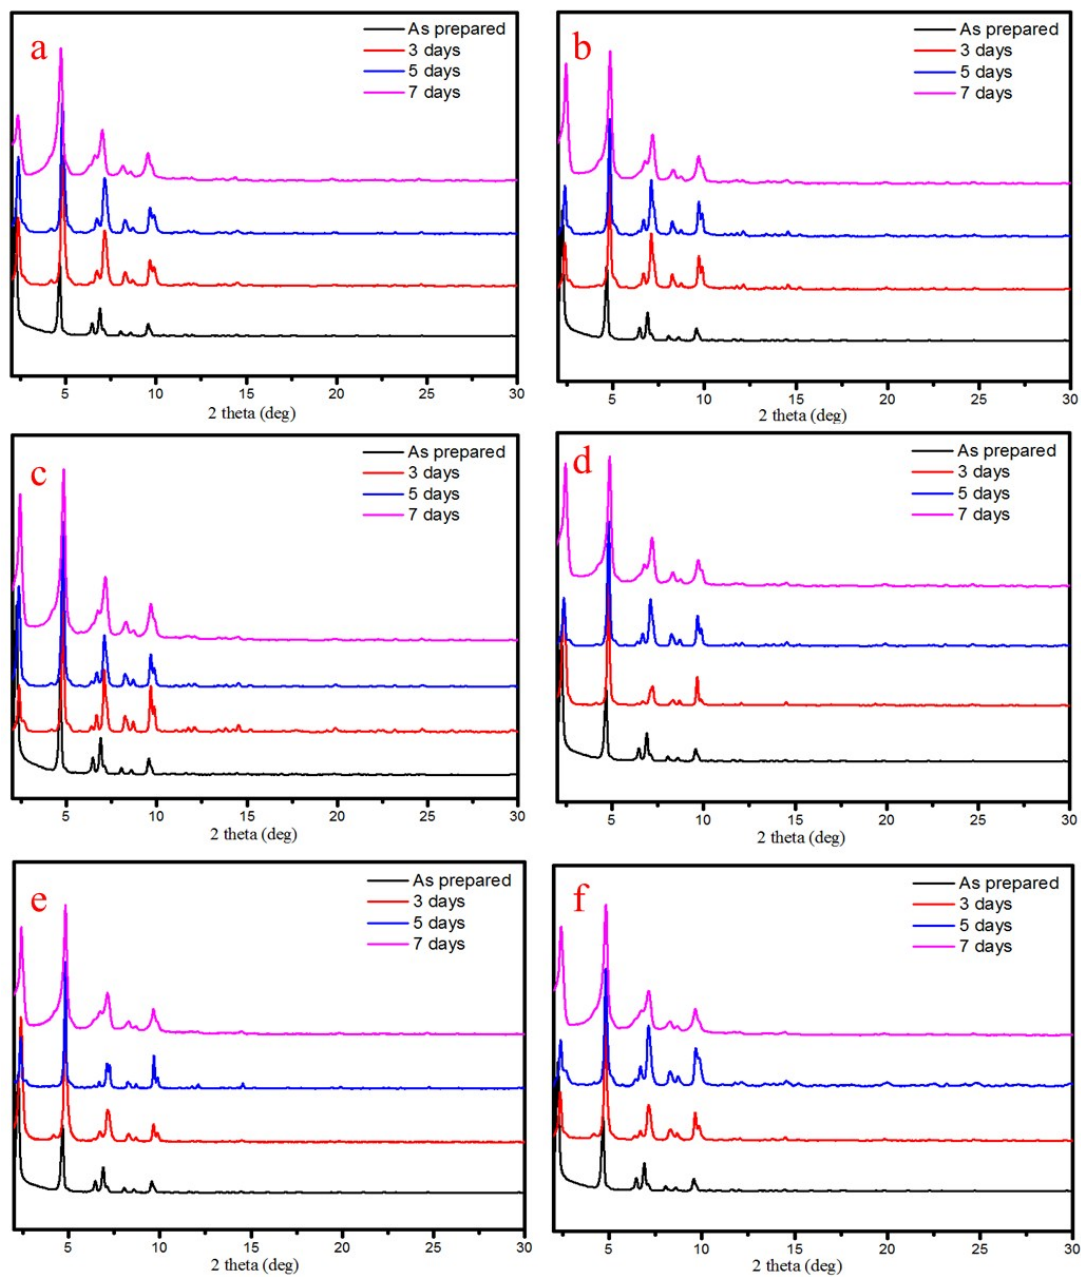

**Figure S6.** PXRD patterns of Pd-PCN-222(Hf) upon treatment in different solvents: acetone (a), acetonitrile (b), dichloromethane (c), ethyl acetate (d), methanol (e), and water (f).

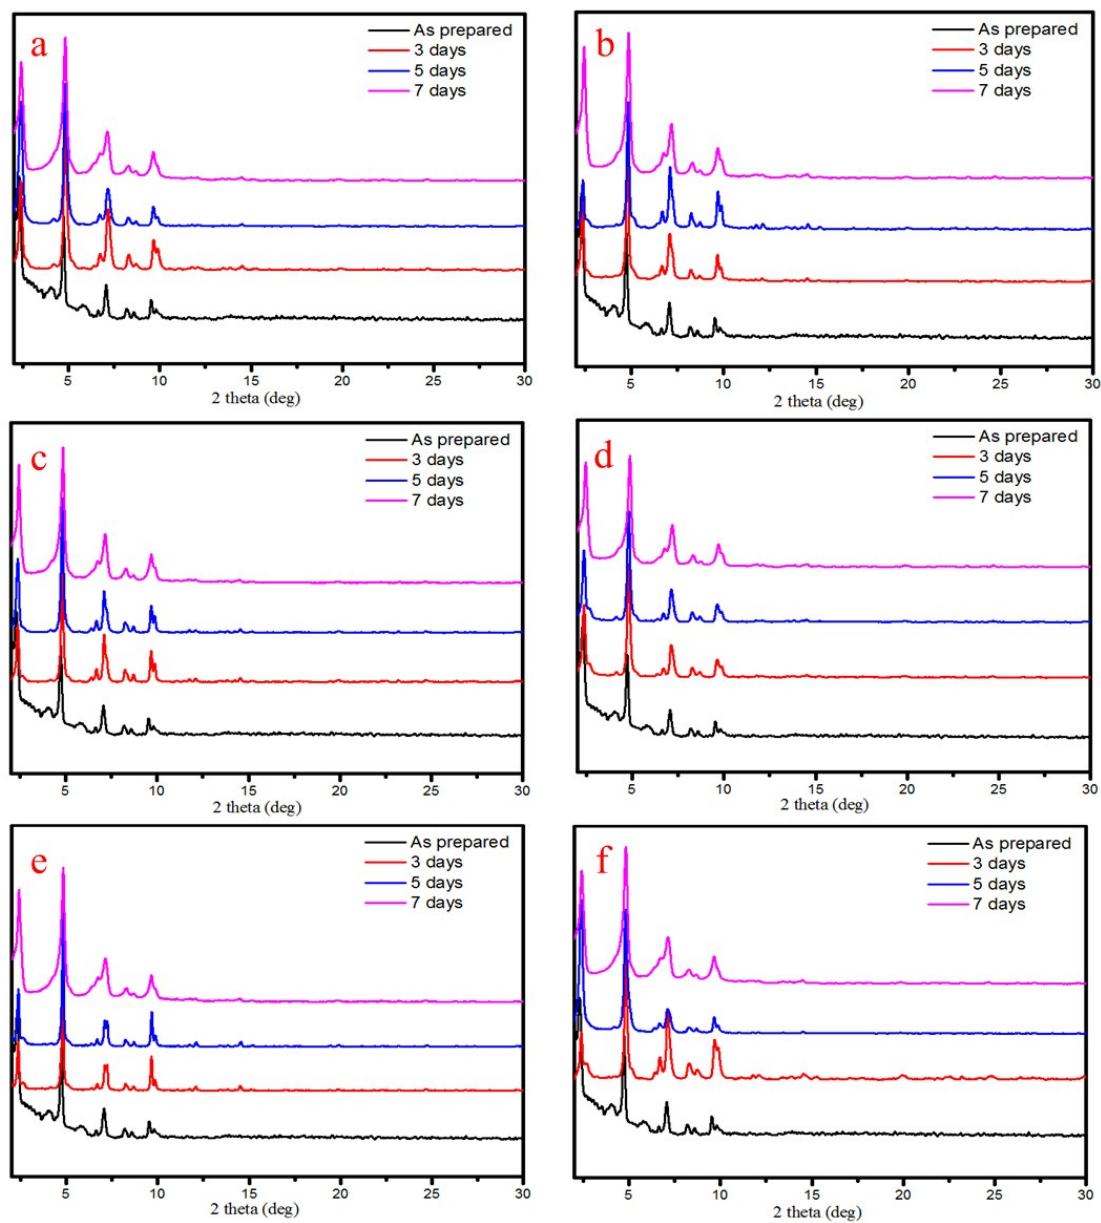

**Figure S7.** PXRD patterns of Pt@Pd-PCN-222(Hf) upon treatment in different solvents: acetone (a), acetonitrile (b), dichloromethane (c), ethyl acetate (d), methanol (e), and water (f).

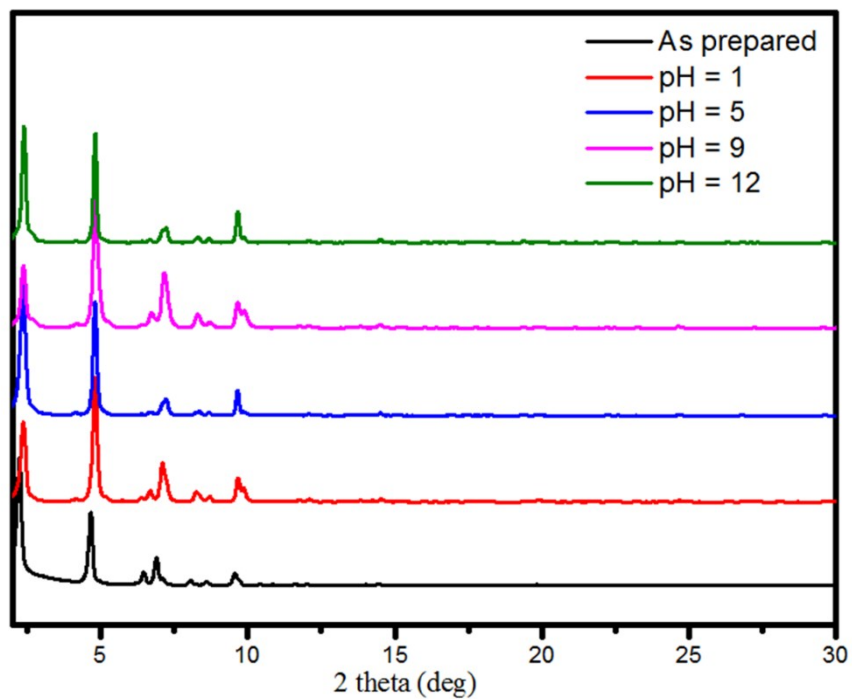

**Figure S8.** PXRD patterns of Pd-PCN-222(Hf) in aqueous solutions with a pH range of 1-12.

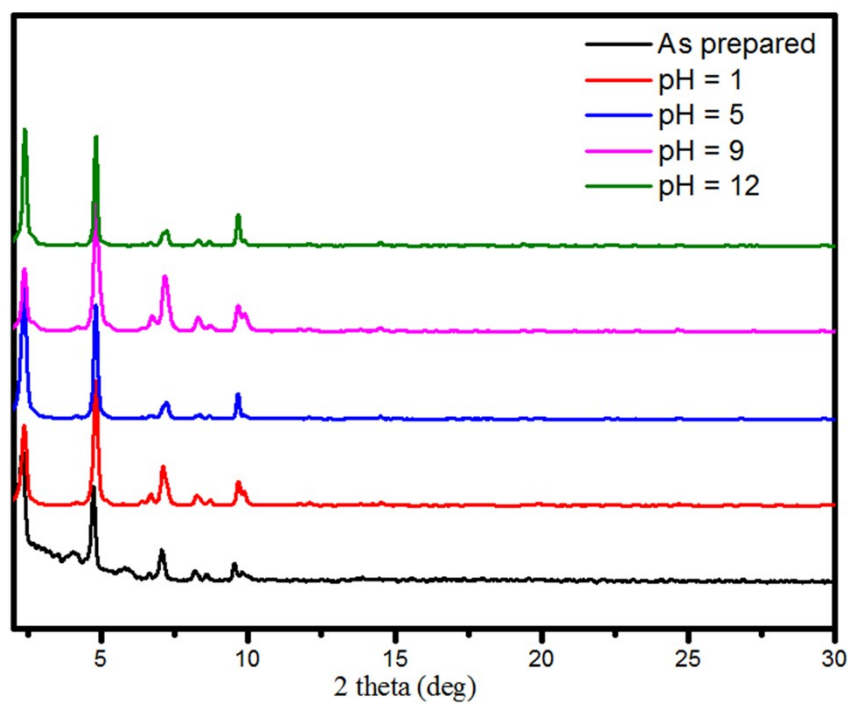

**Figure S9.** PXRD patterns of Pt@Pd-PCN-222(Hf) in aqueous solutions with a pH range of 1-12.

## 5. Photocatalytic Reactions

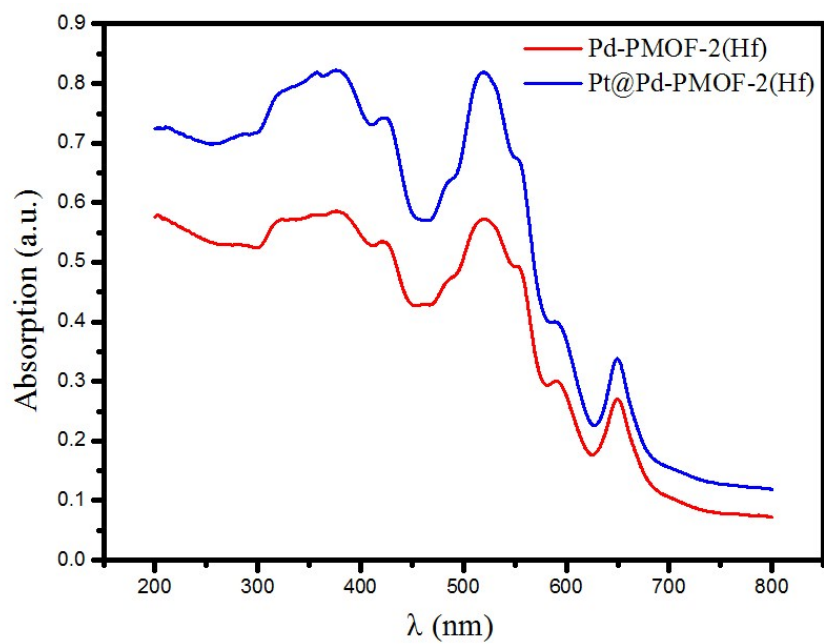

**Figure S10.** Steady-state UV-vis spectra of Pd-PCN-222(Hf) and Pt@Pd-PCN-222(Hf).

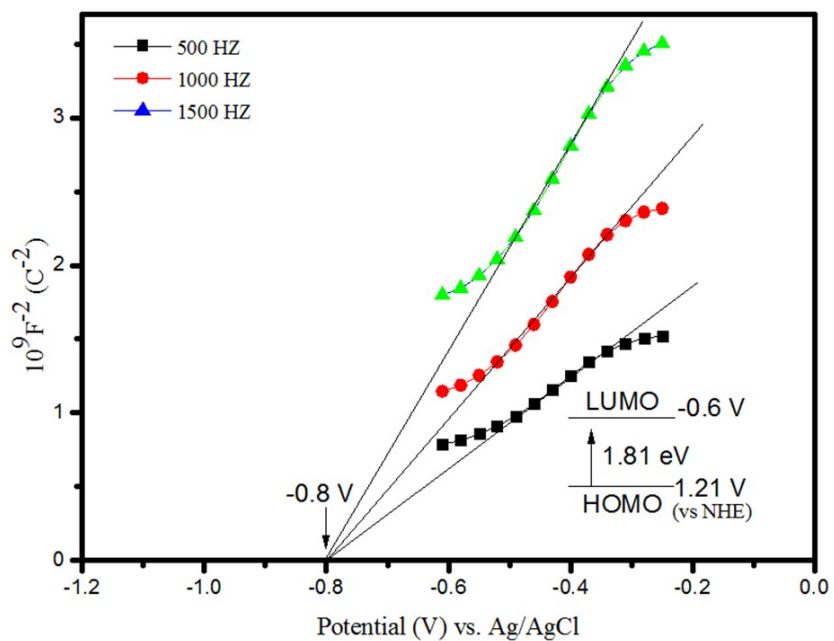

**Figure S11.** Mott-Schottky plots of PdTMCPP in 0.2 M Na<sub>2</sub>SO<sub>4</sub> aqueous solution.

Inset is energy diagram of the HOMO and LUMO levels of PdTMCPP.

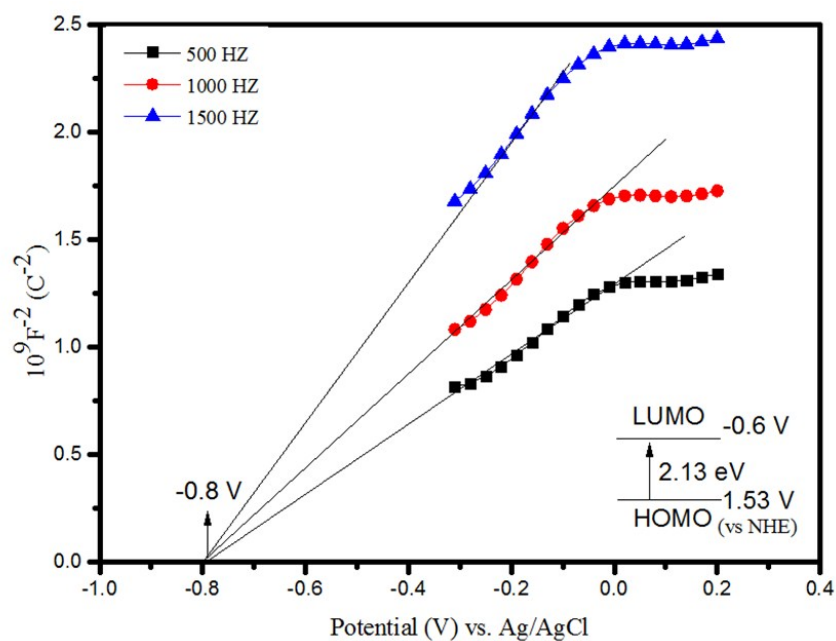

**Figure S12.** Mott-Schottky plots of Pd-PCN-222(Hf) in 0.2 M Na<sub>2</sub>SO<sub>4</sub> aqueous solution.

Inset is energy diagram of the HOMO and LUMO levels of Pd-PCN-222(Hf).

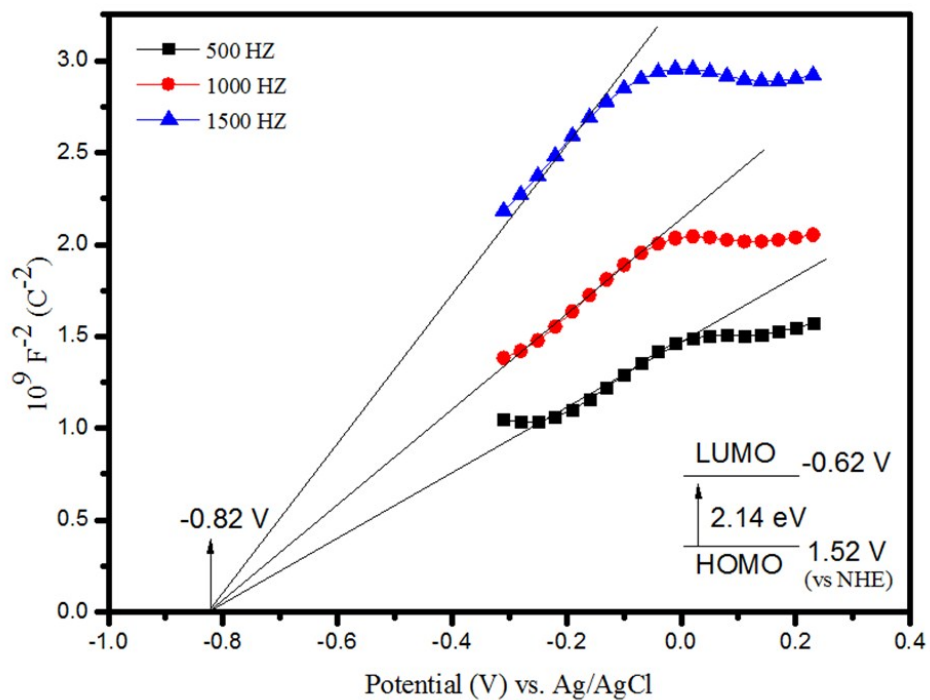

**Figure S13.** Mott-Schottky plots for Pt@Pd-PCN-222(Hf) in 0.2 M Na<sub>2</sub>SO<sub>4</sub> aqueous solution.

Inset is energy diagram of the HOMO and LUMO levels of Pt@Pd-PCN-222(Hf).

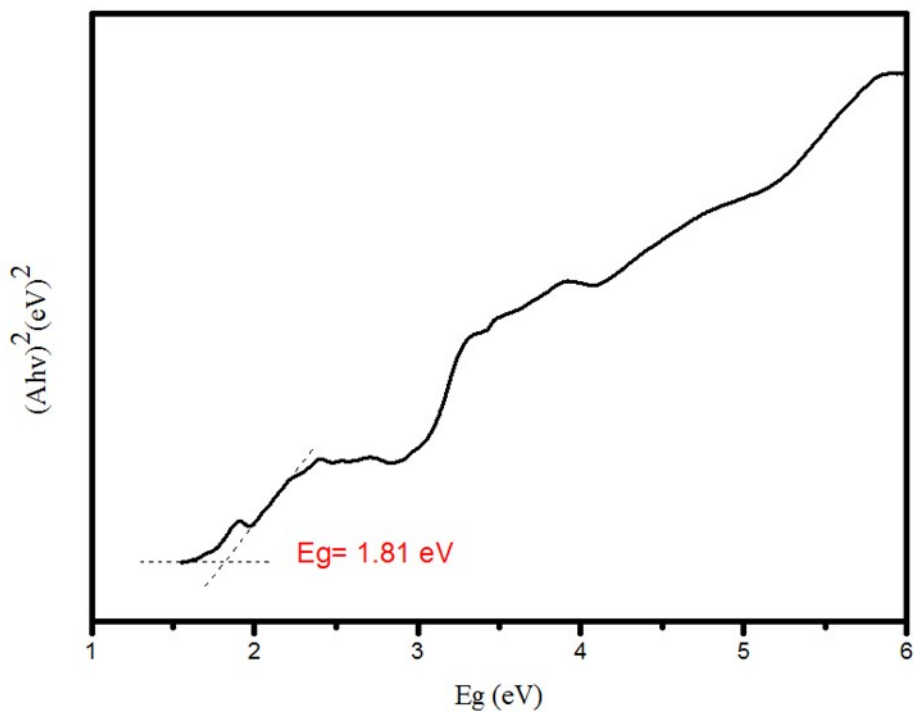

**Figure S14.** Tauc plot of PdTMCPP.

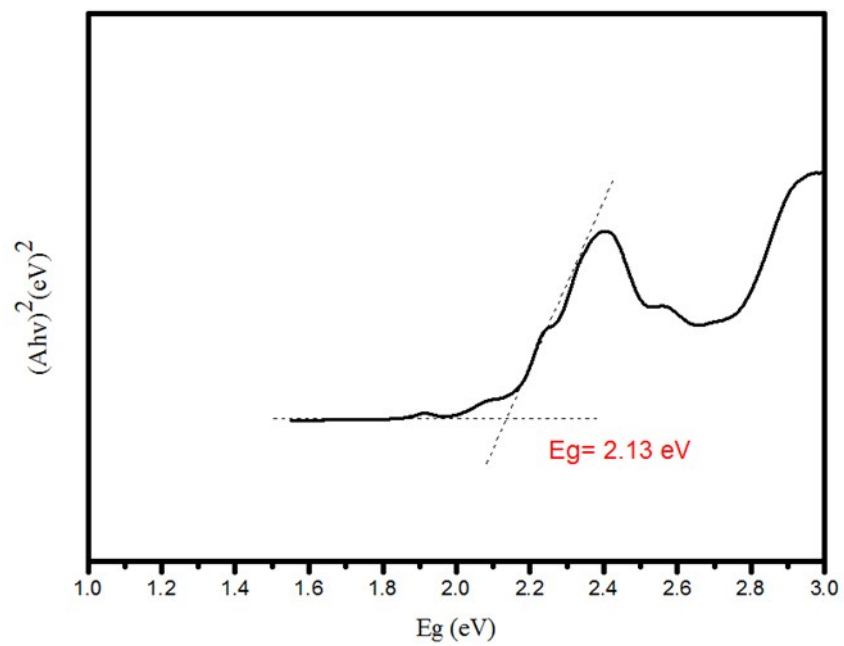

**Figure S15.** Tauc plot of Pd-PCN-222(Hf).

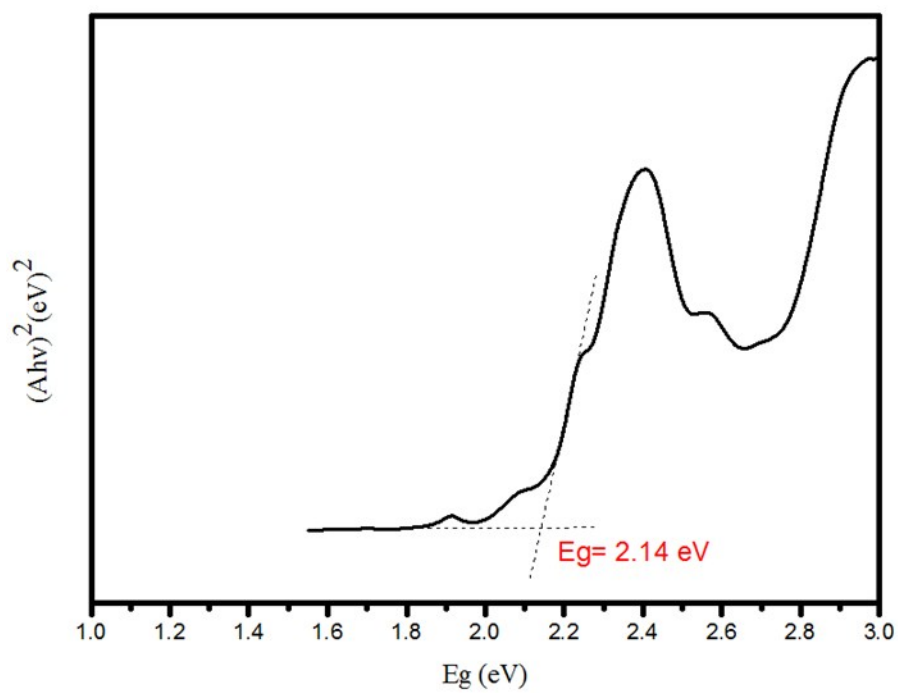

**Figure S16.** Tauc plot of Pt@Pd-PCN-222(Hf).

**Table S2.** Optimization of reaction conditions.<sup>a</sup>

| Entry | Solvent      | V <sub>solvent</sub><br>(mL) | V <sub>H<sub>2</sub>O</sub><br>( $\mu$ L) | Sacrificial Agent | Sacrificial Agent<br>Amount (mL) | H <sub>2</sub> production rate<br>( $\mu$ mol $\cdot$ g <sup>-1</sup> $\cdot$ h <sup>-1</sup> ) |
|-------|--------------|------------------------------|-------------------------------------------|-------------------|----------------------------------|-------------------------------------------------------------------------------------------------|
| 1     | Acetonitrile | 10                           | 250                                       | Triethanolamine   | 2.5                              | 22674                                                                                           |
| 2     | Isopropanol  | 10                           | 250                                       | Triethanolamine   | 2.5                              | 12600                                                                                           |
| 3     | DMF          | 10                           | 250                                       | Triethanolamine   | 2.5                              | 12130                                                                                           |
| 4     | Acetone      | 10                           | 250                                       | Triethanolamine   | 2.5                              | 10073                                                                                           |
| 5     | DMAC         | 10                           | 250                                       | Triethanolamine   | 2.5                              | 9613                                                                                            |
| 6     | DMSO         | 10                           | 250                                       | Triethanolamine   | 2.5                              | 2470                                                                                            |
| 7     | Pyrrole      | 10                           | 250                                       | Triethanolamine   | 2.5                              | 116                                                                                             |
| 8     | Acetonitrile | 10                           | 250                                       | Methanol          | 2.5                              | 3220                                                                                            |
| 9     | Acetonitrile | 10                           | 250                                       | DMA               | 2.5                              | 90                                                                                              |
| 10    | Acetonitrile | 10                           | 250                                       | Ascorbic acid     | 10 mg                            | < 5                                                                                             |
| 11    | Acetonitrile | 10                           | 250                                       | BIH               | 112 mg                           | 11586                                                                                           |
| 12    | Acetonitrile | 10                           | 225                                       | Triethanolamine   | 2.5                              | 10436                                                                                           |
| 14    | Acetonitrile | 10                           | 275                                       | Triethanolamine   | 2.5                              | 13356                                                                                           |
| 15    | Acetonitrile | 10                           | 250                                       | Triethanolamine   | 1.5                              | 15480                                                                                           |
| 17    | Acetonitrile | 10                           | 250                                       | Triethanolamine   | 3.5                              | 11000                                                                                           |

<sup>a</sup>The reaction is using Pt@Pd-PCN-222(Hf) (5 mg) as the catalyst and under visible light irradiation ( $\geq 420$  nm) for 3 h.



**Table S3.** The amount of H<sub>2</sub> produced in different reaction time.

| <b>Time<br/>(h)</b> | <b>The amount of H<sub>2</sub> produced<br/>(<math>\mu\text{mol}\cdot\text{g}^{-1}</math>)</b> | <b>H<sub>2</sub> evolution rate<br/>(<math>\mu\text{mol}\cdot\text{g}^{-1}\cdot\text{h}^{-1}</math>)</b> |
|---------------------|------------------------------------------------------------------------------------------------|----------------------------------------------------------------------------------------------------------|
| 1                   | 18920                                                                                          | 18920                                                                                                    |
| 2                   | 44017                                                                                          | 22008                                                                                                    |
| 3                   | 68023                                                                                          | 22674                                                                                                    |
| 4                   | 77042                                                                                          | 19260                                                                                                    |
| 5                   | 89985                                                                                          | 17997                                                                                                    |
| 6                   | 100558                                                                                         | 16760                                                                                                    |
| 7                   | 106208                                                                                         | 15173                                                                                                    |
| 8                   | 116077                                                                                         | 14510                                                                                                    |
| 20                  | 164575                                                                                         | 8229                                                                                                     |
| 22                  | 174884                                                                                         | 7949                                                                                                     |
| 24                  | 176140                                                                                         | 7339                                                                                                     |
| 26                  | 180091                                                                                         | 6927                                                                                                     |
| 28                  | 186850                                                                                         | 6673                                                                                                     |
| 30                  | 193833                                                                                         | 6461                                                                                                     |
| 32                  | 194168                                                                                         | 6068                                                                                                     |

**Table S4.** H<sub>2</sub> evolution rates of porphyrin-based MOFs.

| <b>Entry</b> | <b>Catalyst</b>   | <b>H<sub>2</sub> production rate<br/>(<math>\mu\text{mol}\cdot\text{g}^{-1}\cdot\text{h}^{-1}</math>)</b> |
|--------------|-------------------|-----------------------------------------------------------------------------------------------------------|
| 1            | PCN-222(Hf)       | 0                                                                                                         |
| 2            | Pt@PCN-222(Hf)    | 441                                                                                                       |
| 3            | Pd-PCN-222(Hf)    | 2476                                                                                                      |
| 4            | Pt@Pd-PCN-222(Hf) | 22674                                                                                                     |

<sup>a</sup>The reaction is using 5 mg catalyst and carried out in the mixed solvent of acetonitrile/water (10 mL/250  $\mu\text{L}$ ) in the presence of triethanolamine (2.5 mL) as the sacrificial agent under visible light irradiation ( $\geq 420$  nm) for 3 h

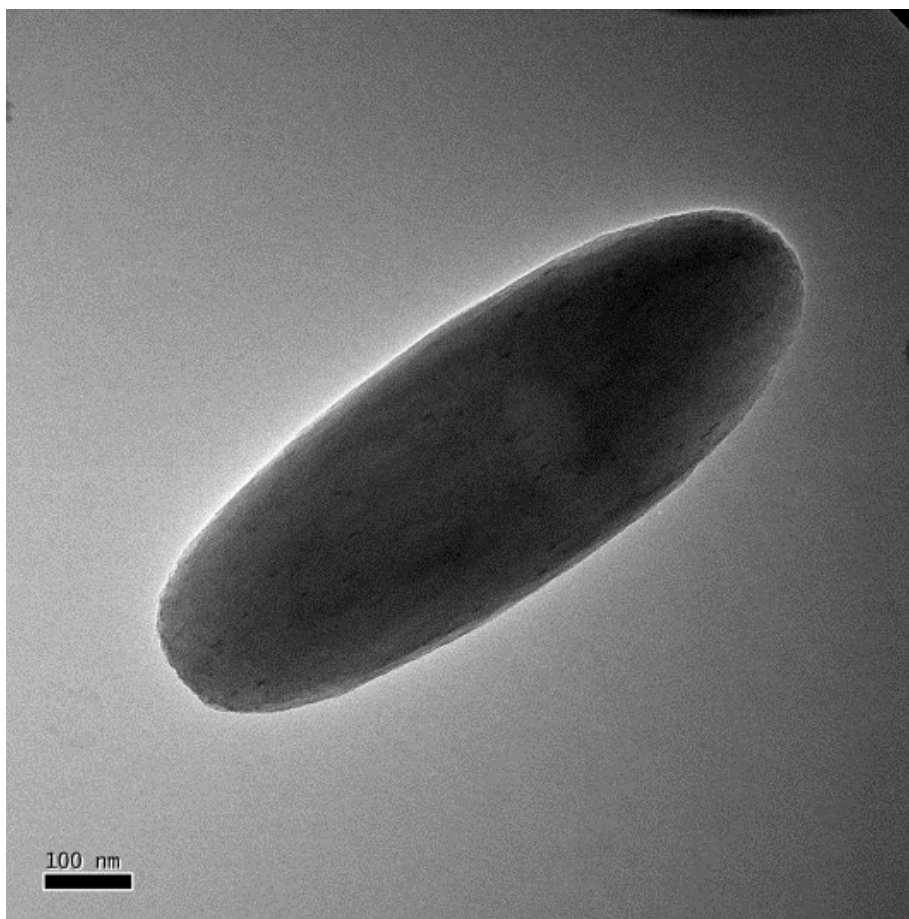

**Figure S17.** The TEM image of Pt@Pd-PCN-222(Hf) after the first run (3 h).

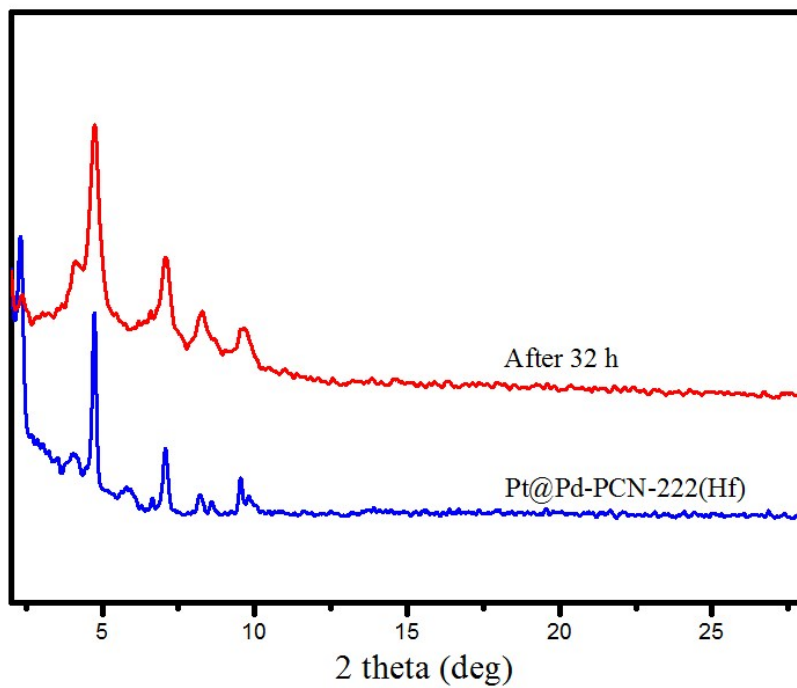

**Figure S18.** PXRD patterns of Pt@Pd-PCN-222(Hf) after photocatalytic reaction of 32 h.

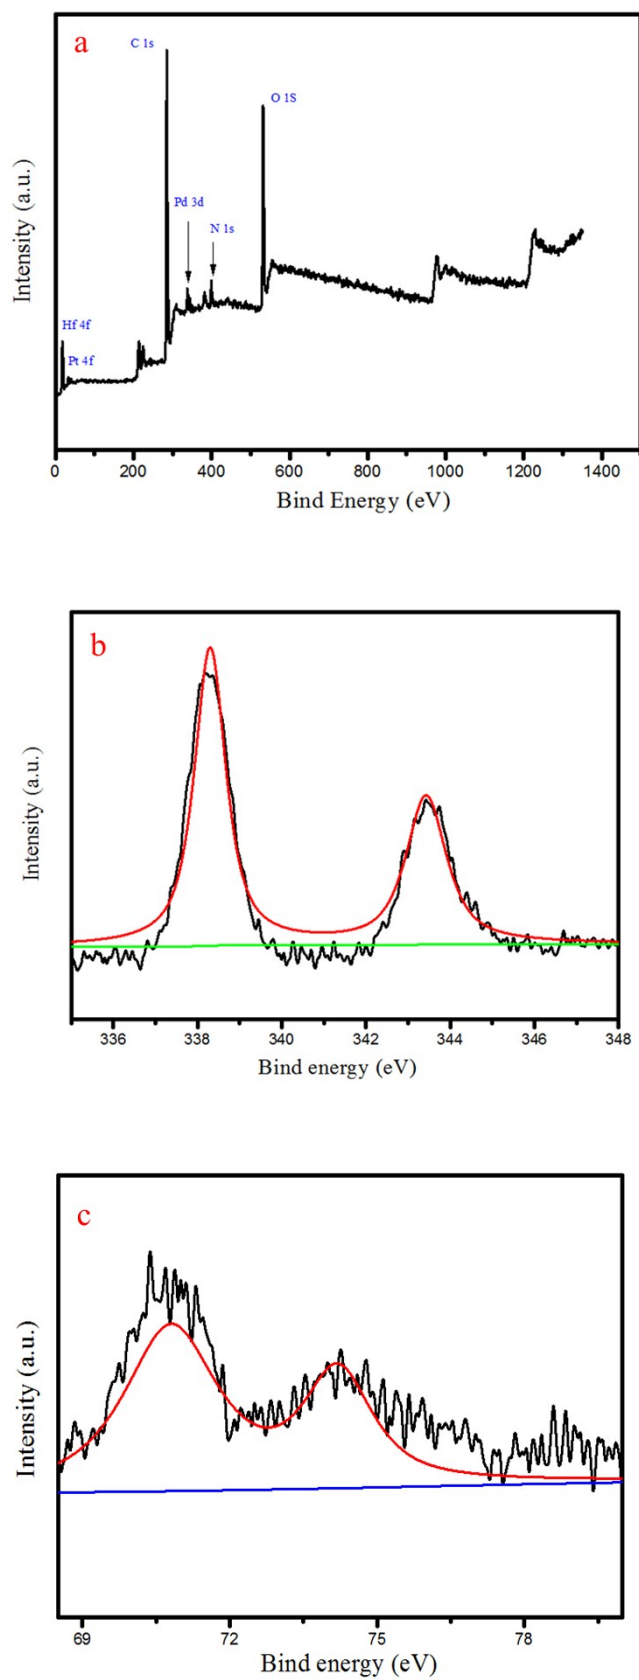

**Figure S19.** XPS spectrum of Pt@Pd-PCN-222(Hf) after photocatalytic reaction of 32 h.

## 6. Mechanism Study

**Table S5.** The TA lifetime of Pd-PCN-222(Hf) and Pt@Pd-PCN-222(Hf).

| Sample            | $\tau_1$ (ps) | $\tau_2$ (ps) |
|-------------------|---------------|---------------|
| Pd-PCN-222(Hf)    | 17500 (76.7%) | 11.4 (23.3%)  |
| Pt@Pd-PCN-222(Hf) | 2.19 (16.6%)  | 7260 (83.4%)  |

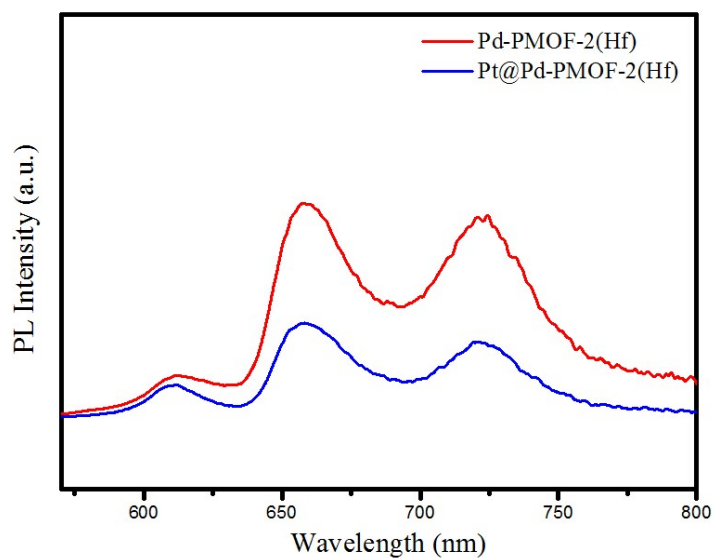

**Figure S20.** Photoluminescence emission spectra of Pd-PCN-222(Hf) and Pt@Pd-PCN-222(Hf).

**Table S6.** The PL lifetime of Pd-PCN-222(Hf) and Pt@Pd-PCN-222(Hf) (in the vacuum).

| Sample            | $\tau_1$ ( $\mu\text{s}$ ) | $\tau_2$ ( $\mu\text{s}$ ) | $\tau_3$ ( $\mu\text{s}$ ) | $\tau$ ( $\mu\text{s}$ ) |
|-------------------|----------------------------|----------------------------|----------------------------|--------------------------|
| Pd-PCN-222(Hf)    | 0.8681(24.48%)             | 10.7177(14.69%)            | 183.548(60.83%)            | 113.4                    |
| Pt@Pd-PCN-222(Hf) | 0.8448(45.23%)             | 10.8696(20.15%)            | 257.235(34.62%)            | 91.6                     |

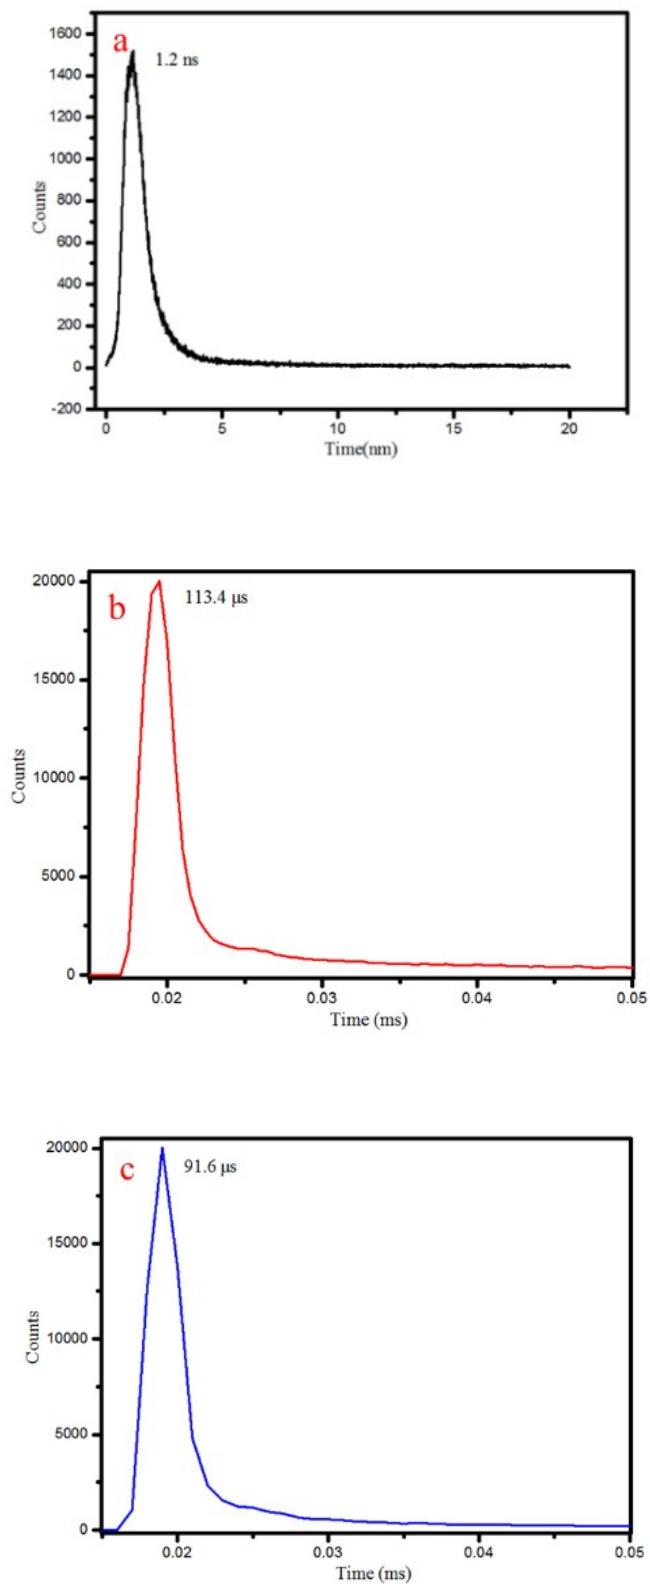

**Figure S21.** Emission decay of PCN-222(Hf) (a), Pd-PCN-222(Hf) (b) and Pt@Pd-PCN-222(Hf) (c) at 298 K under vacuum.
